# Supplementary material
Source: publisher figshare collection journal article supplement (https://acs.figshare.com/ndownloader/files/5070613)
Supplement: Supplementary file 1 [file 5070613]

Supporting Information

for

Excited-State Structural Dynamics of Cytosine  
from Resonance Raman Spectroscopy

*Brant E. Billinghamurst and Glen R. Loppnow\**

Department of Chemistry,

University of Alberta,

Edmonton, Alberta, T6G 2G2, Canada.

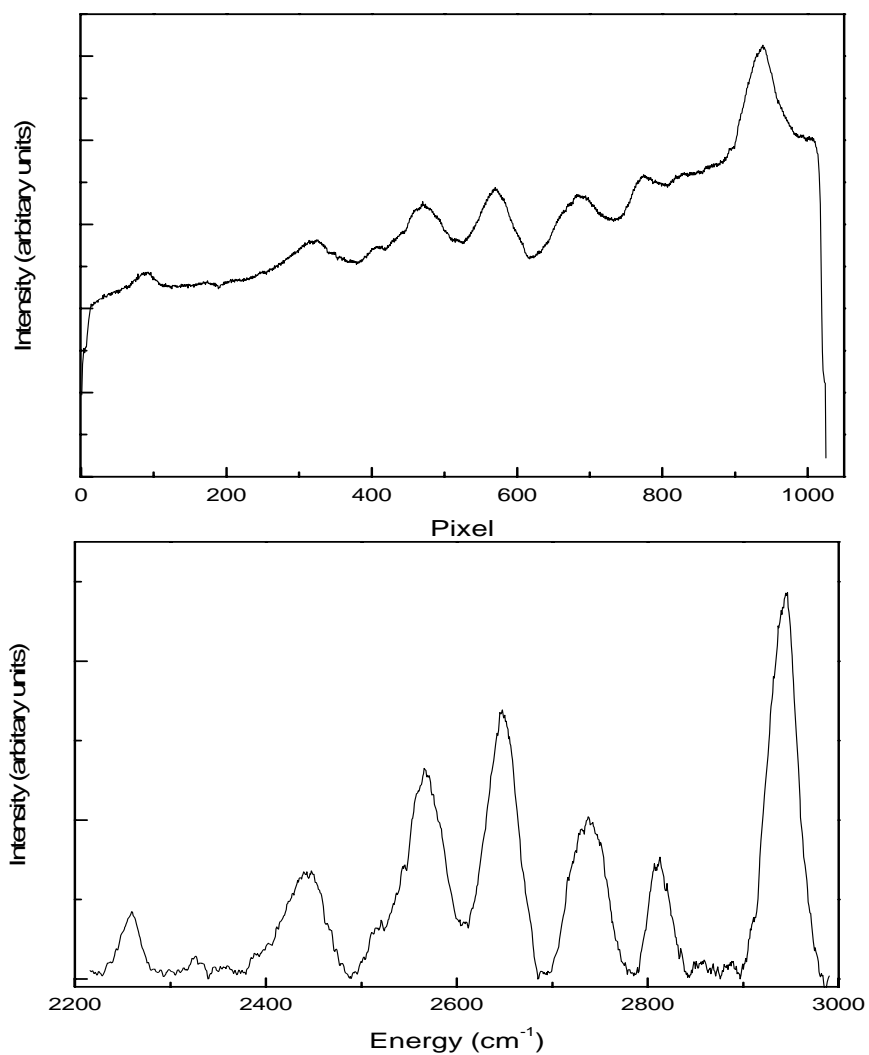

Figure 1S. Top: raw resonance Raman spectrum of the 2200-3000  $\text{cm}^{-1}$  region of cytosine. Bottom: same as top spectrum, after diode array adjustment,  $\tilde{\nu}$  calibration, and baseline correction.
